# Supplementary material for: Regioselective synthesis and crystal structure of C70(CF3)10[C(CO2Et)2]
Source: Royal Society of Chemistry journal article supplement (doi:10.1039/b704924b), 2007-08-28
Supplement: b704924b.pdf [file b704924b.pdf]

*Supporting information for*  
**Selective synthesis and crystal structure of  $C_{70}(CF_3)_{10}[C(CO_2Et)_2]$**

N. S. Ovchinnikova, D. V. Ignat'eva, N. B. Tamm, S. M. Avdoshenko, A. A. Goryunkov, I. N. Ioffe,  
V. Yu. Markov, S. I. Troyanov, L. N. Sidorov, M. A. Yurovskaya, E. Kemnitz

**Table of contents**

- Schlegel diagrams, relative energies at the DFT and AM1 levels of theory of the some theoretical possible isomers of  $C_{70}(CF_3)_{10}CH_2$  and  $C_{70}(CF_3)_{10}[C(CO_2Et)_2]$ . S2
- Schlegel diagrams, relative energies at the DFT and AM1 levels of theory of the some theoretical possible isomers of the  $C_{70}(CF_3)_{10}[CHCO_2Et]$ . S5

Table 1. Schlegel diagrams, relative energies at the DFT and AM1 (in parentheses) levels of theory of some isomers of  $C_{70}(CF_3)_{10}CR_2$  ( $R=H, CO_2Et$ ). The black circles denote attached  $CF_3$  groups, black dumb-bell denotes attached  $CR_2$  fragment.

| $N_u N_d$ | Schlegel Diagrams of $C_{70}(CR_2)$                                                 | $\Delta E, \text{kJ}\cdot\text{mol}^{-1}$ DFT (AM1) |                | Isomer abbreviation                |
|-----------|-------------------------------------------------------------------------------------|-----------------------------------------------------|----------------|------------------------------------|
|           |                                                                                     | $R=H$                                               | $R=CO_2Et$     |                                    |
| 1         | 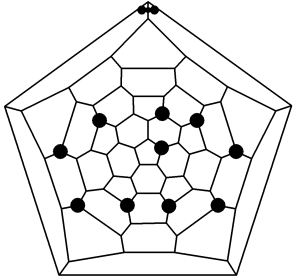   | 0.0<br>(0.0)                                        | 0.0<br>(0.0)   | $a\text{-}C_{70}(CF_3)_{10}[CR_2]$ |
| 2         |   | 8.9<br>(11.5)                                       | 6.5<br>(12.8)  | $c\text{-}C_{70}(CF_3)_{10}[CR_2]$ |
| 3         |  | 10.8<br>(11.7)                                      | 12.7<br>(16.3) | $d\text{-}C_{70}(CF_3)_{10}[CR_2]$ |
| 4         |  | 12.6<br>(14.9)                                      | 15.4<br>(20.9) | $e\text{-}C_{70}(CF_3)_{10}[CR_2]$ |

| <i>N<sub>o</sub>.N<sub>o</sub></i> | <i>Schlegel Diagrams of C<sub>70</sub>(CR<sub>2</sub>)</i>                          | $\Delta E$ , kJ·mol <sup>-1</sup> DFT (AM1) |                            | <i>Isomer abbreviation</i>                                                     |
|------------------------------------|-------------------------------------------------------------------------------------|---------------------------------------------|----------------------------|--------------------------------------------------------------------------------|
|                                    |                                                                                     | <i>R= H</i>                                 | <i>R= CO<sub>2</sub>Et</i> |                                                                                |
| 5                                  | 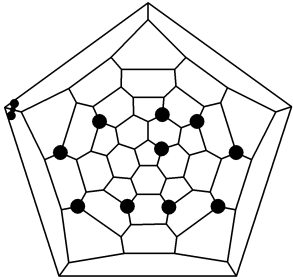   | 11.1<br>(20.4)                              | 17.1<br>(22.1)             | <i>b</i> -C <sub>70</sub> (CF <sub>3</sub> ) <sub>10</sub> [CR <sub>2</sub> ]  |
| 6                                  |    | 19.3<br>(15.1)                              | 18.2<br>(28.0)             | <i>b'</i> -C <sub>70</sub> (CF <sub>3</sub> ) <sub>10</sub> [CR <sub>2</sub> ] |
| 7                                  |   | 0.5<br>(13.7)                               | 23.1<br>(49.3)             | <i>d'</i> -C <sub>70</sub> (CF <sub>3</sub> ) <sub>10</sub> [CR <sub>2</sub> ] |
| 8                                  |  | 23.9<br>(21.3)                              | 24.9<br>(29.6)             | <i>c'</i> -C <sub>70</sub> (CF <sub>3</sub> ) <sub>10</sub> [CR <sub>2</sub> ] |
| 9                                  |  | -23.1<br>(18.8)                             | 49.6<br>(80.7)             | <i>a'</i> -C <sub>70</sub> (CF <sub>3</sub> ) <sub>10</sub> [CR <sub>2</sub> ] |

| <i>N<sub>0</sub>N<sub>0</sub></i> | <i>Schlegel Diagrams of C<sub>70</sub>(CR<sub>2</sub>)</i>                         | $\Delta E$ , kJ·mol <sup>-1</sup> DFT (AM1) |                            | <i>Isomer abbreviation</i>                                                    |
|-----------------------------------|------------------------------------------------------------------------------------|---------------------------------------------|----------------------------|-------------------------------------------------------------------------------|
|                                   |                                                                                    | <i>R= H</i>                                 | <i>R= CO<sub>2</sub>Et</i> |                                                                               |
| 10                                | 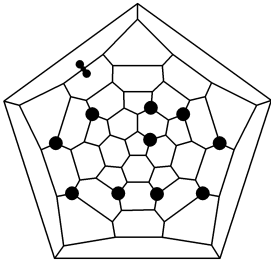  | 20.6<br>(60.1)                              | > 20                       | <i>g</i> -C <sub>70</sub> (CF <sub>3</sub> ) <sub>10</sub> [CR <sub>2</sub> ] |
| 11                                |   | 21.6<br>(61.9)                              | > 20                       | <i>i</i> -C <sub>70</sub> (CF <sub>3</sub> ) <sub>10</sub> [CR <sub>2</sub> ] |
| 12                                |  | 40.3<br>(85.6)                              | > 20                       | <i>h</i> -C <sub>70</sub> (CF <sub>3</sub> ) <sub>10</sub> [CR <sub>2</sub> ] |

Table 2. Schlegel diagrams, relative energies at the DFT and AM1 (in parentheses) levels of theory for some isomers of  $C_{70}(CF_3)_{10}CHCO_2Et$ . The black circles denote attached  $CF_3$  groups; empty dumb-bell denotes attached  $CH(CO_2Et)$  fragment, where small and large circles correspond H and  $CO_2Et$  groups.

| $N_2N_2$<br>(isomer) | Schlegel Diagrams of<br>$C_{70}(CF_3)_{10}CHCO_2Et$ #1                              | $\Delta\Delta_f H_0^o$<br>$kJ\cdot mol^{-1}$ | Schlegel Diagrams of<br>$C_{70}(CF_3)_{10}CHCO_2Et$ #2                               | $\Delta\Delta_f H_0^o$<br>$kJ\cdot mol^{-1}$ |
|----------------------|-------------------------------------------------------------------------------------|----------------------------------------------|--------------------------------------------------------------------------------------|----------------------------------------------|
| 1<br>(a)             | 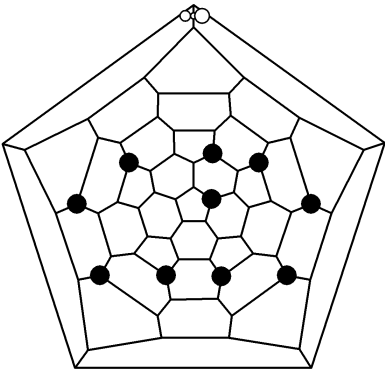   | 0.1<br>(0.0)                                 |    | 0.0<br>(0.3)                                 |
| 2<br>(d')            |   | 2.8<br>(16.2)                                |   | 19.4<br>(35.1)                               |
| 3<br>(c)             |  | 10.5<br>(12.7)                               |  | 10.8<br>(11.7)                               |

| <i>N<sub>o</sub></i> <i>N<sub>o</sub></i><br>( <i>isomer</i> ) | <i>Schlegel Diagrams of</i><br><i>C</i> <sub>70</sub> ( <i>CF</i> <sub>3</sub> ) <sub>10</sub> <i>CHCO</i> <sub>2</sub> <i>Et</i> #1 | $\Delta\Delta_f H_0^o$<br>kJ·mol <sup>-1</sup> | <i>Schlegel Diagrams of</i><br><i>C</i> <sub>70</sub> ( <i>CF</i> <sub>3</sub> ) <sub>10</sub> <i>CHCO</i> <sub>2</sub> <i>Et</i> #2 | $\Delta\Delta_f H_0^o$<br>kJ·mol <sup>-1</sup> |
|----------------------------------------------------------------|--------------------------------------------------------------------------------------------------------------------------------------|------------------------------------------------|--------------------------------------------------------------------------------------------------------------------------------------|------------------------------------------------|
| 4<br>( <i>d</i> )                                              |                                                                                                                                      | 11.2<br>(14.3)                                 |                                                                                                                                      | 10.9<br>(12.8)                                 |
| 5<br>( <i>b</i> )                                              |                                                                                                                                      | 14.9<br>(18.2)                                 |                                                                                                                                      | 15.5<br>(16.2)                                 |
| 6<br>( <i>e</i> )                                              |                                                                                                                                      | 15.3<br>(16.2)                                 |                                                                                                                                      | 15.4<br>(16.5)                                 |
| 7<br>( <i>b</i> )                                              |                                                                                                                                      | 21.6<br>(23.4)                                 |                                                                                                                                      | 19.1<br>(21.9)                                 |

| <i>N<sub>2</sub>N<sub>2</sub></i><br>( <i>isomer</i> ) | <i>Schlegel Diagrams of</i><br><i>C<sub>70</sub>(CF<sub>3</sub>)<sub>10</sub>CHCO<sub>2</sub>Et #1</i> | $\Delta \Delta_f H_0^o$<br>$\text{kJ}\cdot\text{mol}^{-1}$ | <i>Schlegel Diagrams of</i><br><i>C<sub>70</sub>(CF<sub>3</sub>)<sub>10</sub>CHCO<sub>2</sub>Et #2</i> | $\Delta \Delta_f H_0^o$<br>$\text{kJ}\cdot\text{mol}^{-1}$ |
|--------------------------------------------------------|--------------------------------------------------------------------------------------------------------|------------------------------------------------------------|--------------------------------------------------------------------------------------------------------|------------------------------------------------------------|
| 8<br>( <i>c'</i> )                                     | 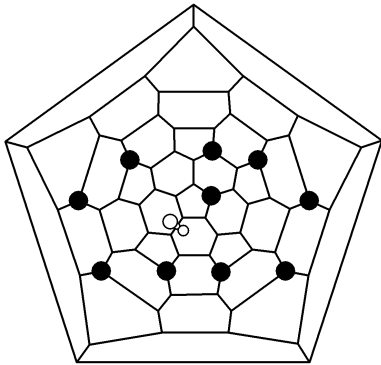                      | 25.0<br>(25.1)                                             |                      | 25.5<br>(22.9)                                             |
| 9<br>( <i>a'</i> )                                     |                      | -14.7<br>(24.7)                                            |                     | 34.3<br>(61.5)                                             |
